# Supplementary material for: N-MYC Downstream Regulated Gene 4 (NDRG4), a Frequent Downregulated Gene through DNA Hypermethylation, plays a Tumor Suppressive Role in Esophageal Adenocarcinoma
Source: MDPI journal article supplement (doi:10.3390/cancers12092573), 2020-09-10

Supplementary Materials

N-MYC Downstream Regulated Gene 4 (*NDRG4*), a Frequent Downregulated Gene through DNA Hypermethylation, plays a Tumor Suppressive Role in Esophageal Adenocarcinoma

Longlong Cao, Tianling Hu, Heng Lu and Dunfa Peng

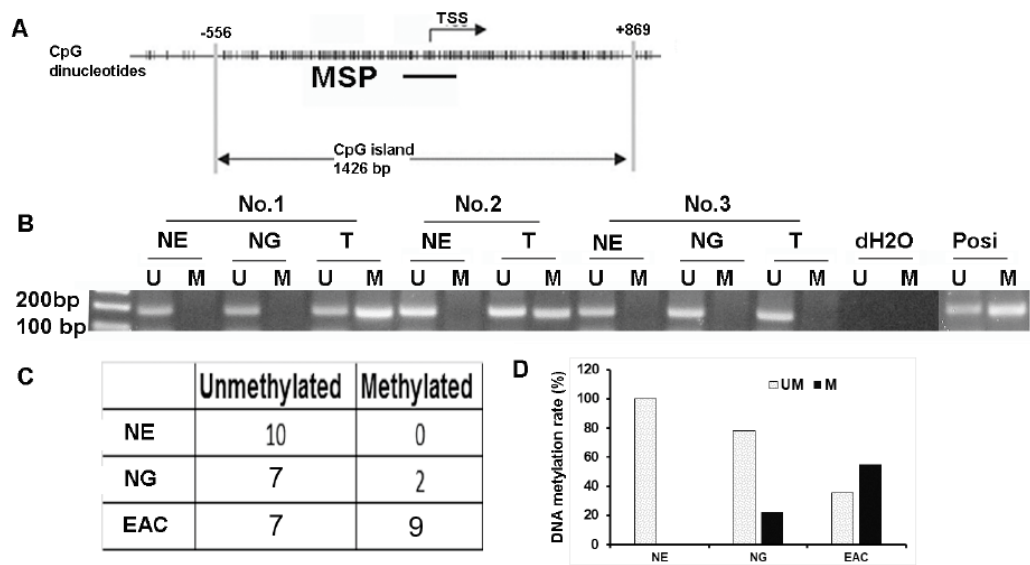

**Figure S1.** Methylation-specific PCR for *NDRG4*. (A) a schematic drawing shows the structure of *NDRG4* promoter region. There is a large CpG island spanning from -556 to + 869 of transcription start site (TSS). A MSP primer set (including 4 primers) was designed to cover TSS. (B) Representative MSP images from 3 primary normal and tumor samples. U stands for unmethylated bands, M stands for methylated bands. Posi means positive controls for unmethylated DNA and methylated DNA. NE, normal esophagus; NG, normal gastric mucosa. (C) and (D) summary of *NDRG4* methylation states in samples examined.

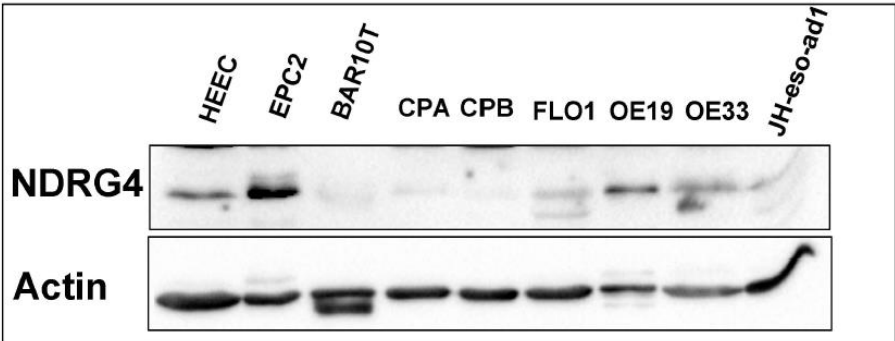

**Figure S2.** *NDRG4* protein levels were downregulated in BE and EAC cell lines. Western blotting analysis of *NDRG4* protein in esophageal cell lines. *NDRG4* protein levels were higher in two normal esophagus cell lines; HEEC and EPC2, but down regulated in BE and majority of EAC cell lines.

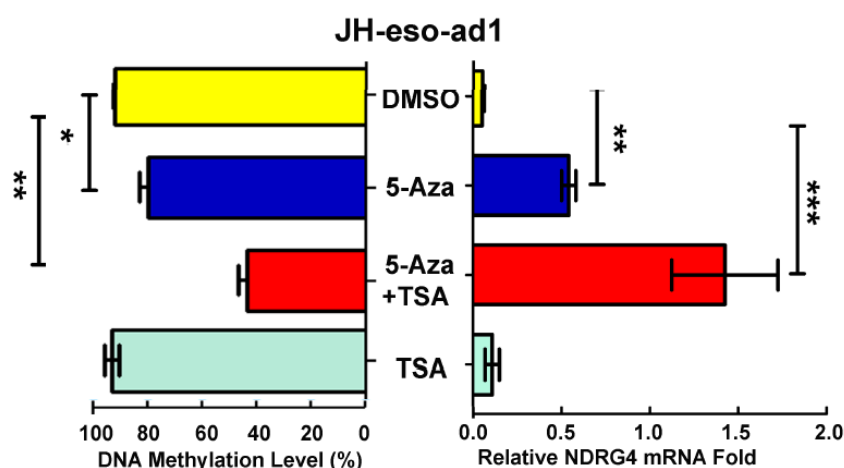

**Figure S3.** 5-Aza restored NDRG4 gene expression in JH-eso-ad1 cells. Tumor cells were treated with 5  $\mu$ M 5-Aza and 100 nM TSA alone or in combination. qPCR was used to evaluate relative mRNA fold change of NDRG4 (right side) and Pyrosequencing was applied to quantitate NDRG4 methylation level change (left side). \* $p < 0.05$ ; \*\* $p < 0.01$ ; \*\*\* $p < 0.001$ .

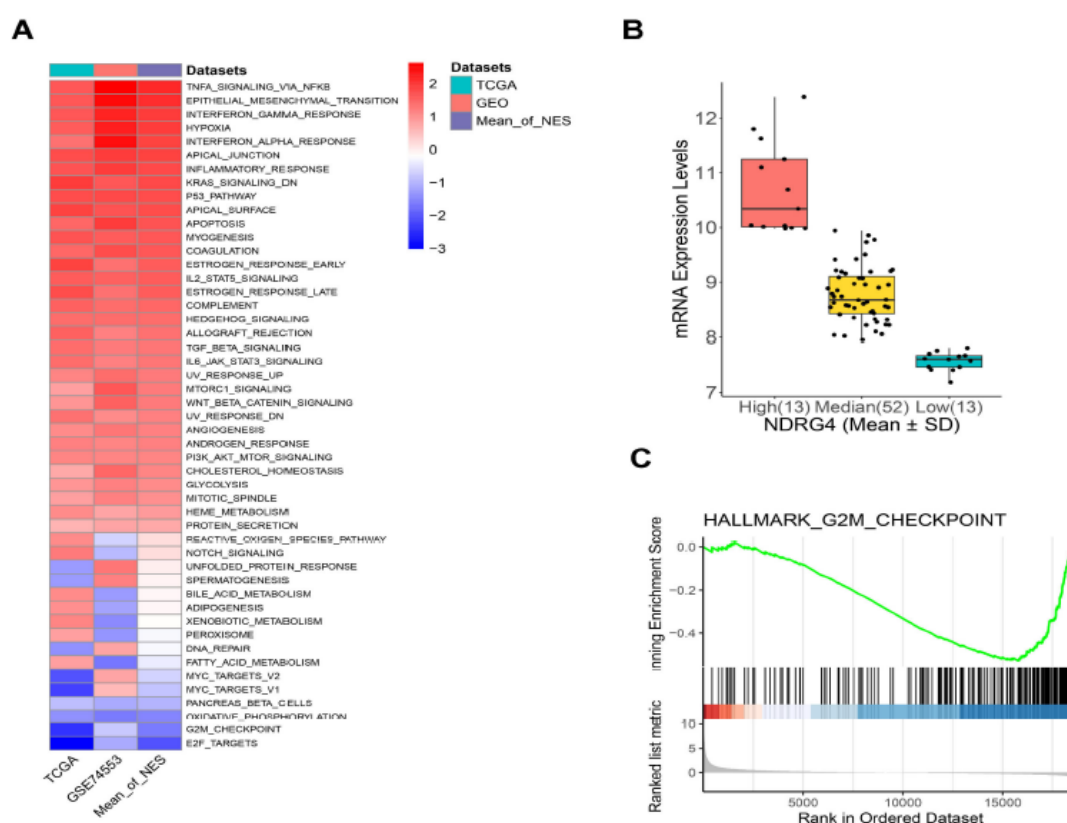

**Figure S4.** Pathway analysis of NDRG4-related genes. (A) a heatmap showed Normalization Enrichment score (NES) values of 50 hallmark gene sets (archived from MSigDB) in TCGA cohorts and GSE74553 dataset by GSEA analysis. (B) The Mean  $\pm$  SD of NDRG4 expression levels were used as the cut-off points to separate the TCGA samples into three groups: high group ( $n = 13$ ), median group ( $n = 52$ ), and low group ( $n = 13$ ). (C) G2M pathway can be obviously enriched in the NDRG4 low expression group in TCGA cohort (NES = -2.507, FDR q value = 0.085).

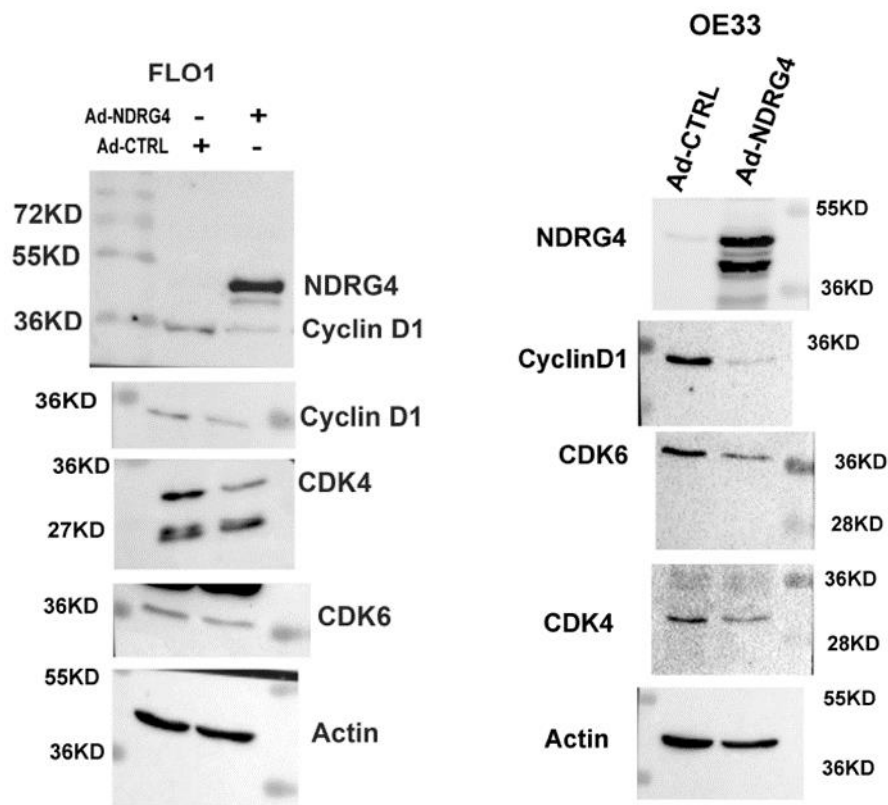

Figure S5. Detail information about Figure 6B.

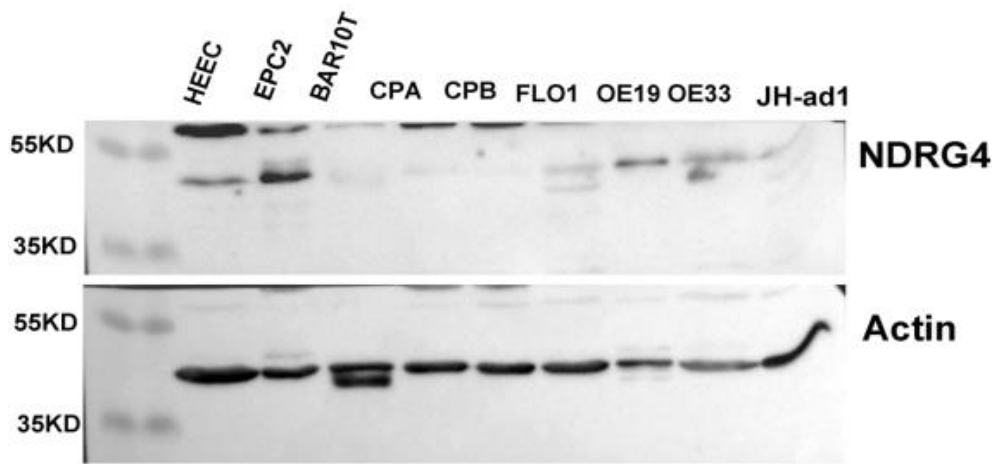

Detail information about Figure S2.

**Table S3.** TOP candidate genes.

| Symbol        | CpG Island | Validated by MSP |               |               |
|---------------|------------|------------------|---------------|---------------|
|               |            |                  | Normal        | EAC           |
| MT3           | Yes        | yes              | 15.8% (3/19)  | 68.8% (11/16) |
| NDRG4         | yes        | yes              | 10.5% (2/19)  | 56.3% (9/16)  |
| G0S2          | yes        | yes              | 52.6% (10/19) | 56.3% (9/16)  |
| MLLT7 (FOXO4) | yes        | yes              | 21.1% (4/19)  | 18.8% (3/16)  |
| INA           | yes        | yes              | 15.8% (3/19)  | 75.0% (12/16) |
| GAGE          | yes        | yes              | 100% (19/19)  | 100% (16/16)  |
| PLCD1         | yes        | yes              | 10.5% (2/19)  | 12.5% (2/16)  |
| MT1H          | yes        | NA               | NA            | NA            |
| NDRG1         | yes        | NA               | NA            | NA            |
| CA2           | yes        | NA               | NA            | NA            |

**Table S4.** Cell lines used in this study.

|                            | Name       | Sources                                  | Medium    | FBS |
|----------------------------|------------|------------------------------------------|-----------|-----|
| Normal esophagus           | HEEC       | ScienCell Research Laboratories, CA, USA | EpiCM-2   | 5%  |
|                            | EPC2       | Dr. Hiroshi Nakagawa                     | EpiCM-2   | 5%  |
| Barrett's esophagus        | BAR-10T    | Dr. Rhonda Souza                         | EpiCM-2   | 5%  |
|                            | CPA        | American Type Culture Collection, ATCC   | EpiCM-2   | 5%  |
| Dysplasia                  | CPB        | ATCC                                     | EpiCM-2   | 5%  |
|                            | FLO1       | ATCC                                     | DMEM      | 10% |
| Esophageal adeno-carcinoma | OE19       | Sigma-Aldrich, St Louis, Missouri, USA   | RPMI 1640 | 10% |
|                            | ESO26      | Sigma-Aldrich, St Louis, Missouri, USA   | DMEM      | 10% |
|                            | ESO51      | Sigma-Aldrich, St Louis, Missouri, USA   | DMEM      | 10% |
|                            | OACM5.1    | Sigma-Aldrich, St Louis, Missouri, USA   | DMEM      | 10% |
|                            | OE33       | Drs David Beer and Jim Eshleman          | RPMI 1640 | 10% |
|                            | JH-eso-Ad1 | Drs David Beer and Jim Eshleman          | DMEM      | 10% |
|                            |            |                                          |           |     |
| Esophageal fibroblast      | hEF        | ScienCell Research Laboratories, CA, USA | DMEM      | 10% |
| Kidney                     | HEK293     | Cell BioLabs Inc, San Diego, CA, USA     | DMEM      | 10% |
|                            | AD         |                                          |           |     |

**Table S5.** Sequences for qPCR primers.

|                                                           |
|-----------------------------------------------------------|
| <b>The Sequence of <i>NDRG4</i> Primers for qPCR are:</b> |
| Forward, 5'-GGCCTTCTGCATGTAGTGATCCG-3'                    |
| Reverse, 5'-GGTGATCTCCTGCATGTCCTCG-3'.                    |
| <b>The Sequence of <i>HPRT</i> Primers for qPCR are:</b>  |
| Forward, 5'- TTGGAAAGGGTGT TT ATTCTCA -3'                 |
| Reverse, 5'- TCCAGCAGGTCAGCAAAGAA-3'.                     |

**Table S6.** Sequences for *NDRG4* MSP primers.

|                                                        |
|--------------------------------------------------------|
| <b>The Primer Sets for Unmethylated DNA are:</b>       |
| Forward, 5'-GGA TTA GTT TTA GGT TTG GTA TTG TTT TGT-3' |
| Reverse, 5'-ACA AAA CTT CAA CAC CAC CAA CAC ACA-3'.    |
| <b>The Primer Sets for Methylated DNA are:</b>         |
| Forward, 5'-TTA GTT TTA GGT TCG GTA TCG TTT CGC-3'     |
| Reverse, 5'-CTT CGA CGC CGC CGA CGC GCG-3'.            |

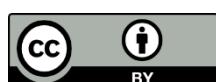

Supplement: s1 [file s1]
